# Supplementary material for: Identification of carboxyl terminal peptide of Fibrinogen as a potential serum biomarker for gastric cancer
Source: Springer Nature journal article supplement (doi:10.1007/s13277-015-4394-y), 2015-12-11
Supplement: MOESM3 [file 9261024]

**Table 3.** The expression of three significantly different protein peaks in the validation dataset

| M/Z | *P* | Intensity  GC(*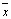*±SD) | Intensity  CGD(X*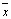*SD) | Intensity  CON(*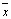*±SD) |
| --- | --- | --- | --- | --- |
| 5910 | 1.0E -06 | 45.5±13.1 | 5.8±1.9 | 9.2±4.7 |
| 5342 | 0.03 | 14.4±14.8 | 1.3±0.2 | 3.1±1.2 |
| 6439 | 0.005 | 8.2±9.9 | 22.3±6.0 | 22.8±16.4 |

GC: gastric cancer; CGD: chronic gastric disease; CON: normal control; Data were expressed as mean (*
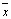
*) ± standard deviation (SD).
